# Supplementary material for: Maternal Exercise Impacts Offspring Metabolic Health in Adulthood: A Systematic Review and Meta-Analysis of Animal Studies
Source: MDPI journal article supplement (doi:10.3390/nu15122793), 2023-06-19

*Supplementary Materials*

1. Supplementary Tables

Table S1. Study quality assessment (.xlsx)

2. Supplementary Figures

Figure S1. Publication bias.

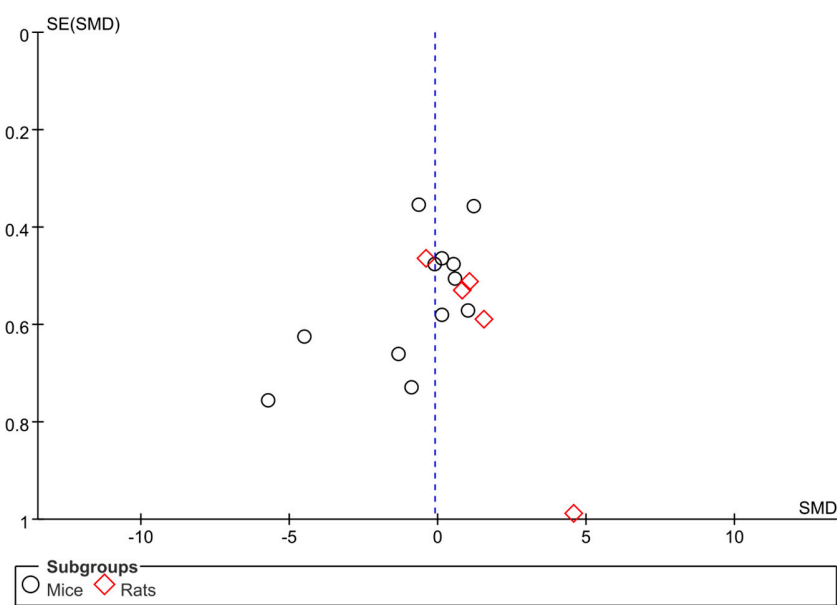

Figure S2. Forest plot of subgroup analysis per species for body weight.

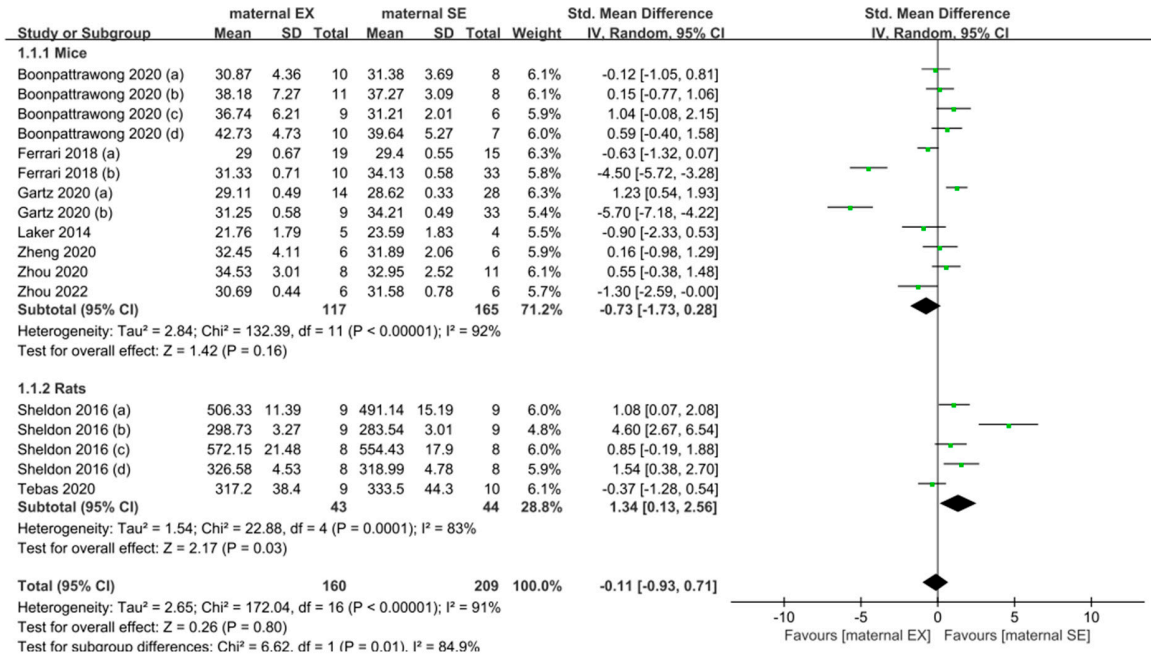

Figure S3. Forest plot of subgroup analysis per species for fasting blood glucose.

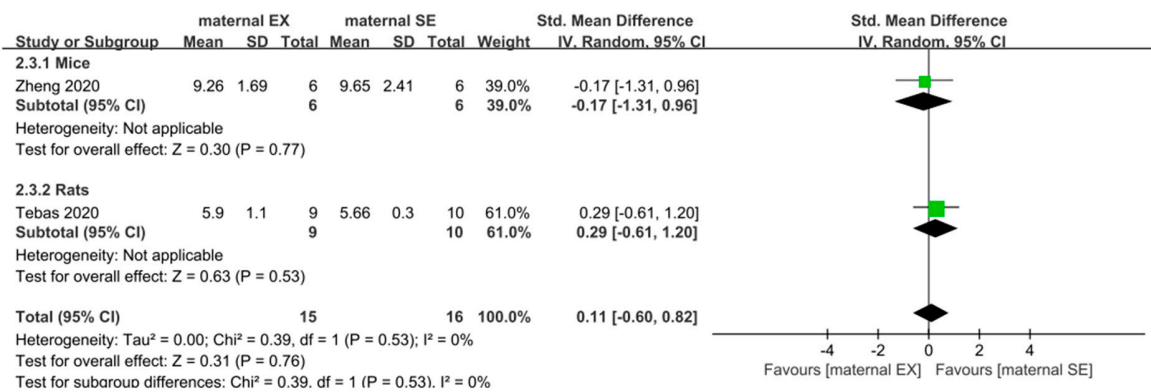

**Figure S4. Forest plot of (A) total cholesterol, (B) triglyceride, (C) low density lipoprotein, and (D) free fatty acids.**

**A**

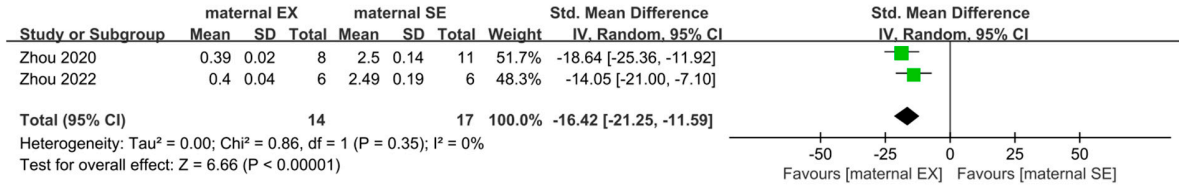

**B**

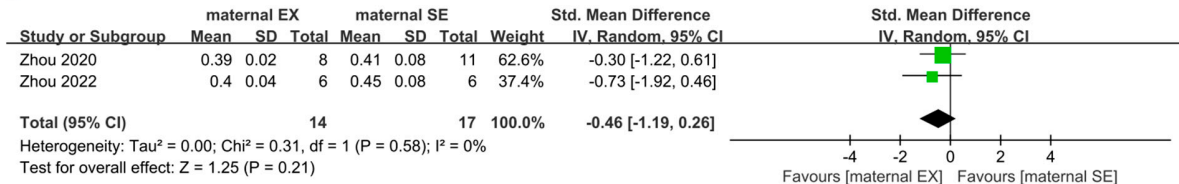

**C**

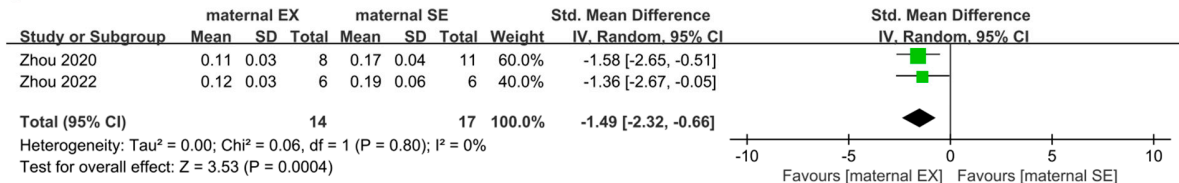

**D**

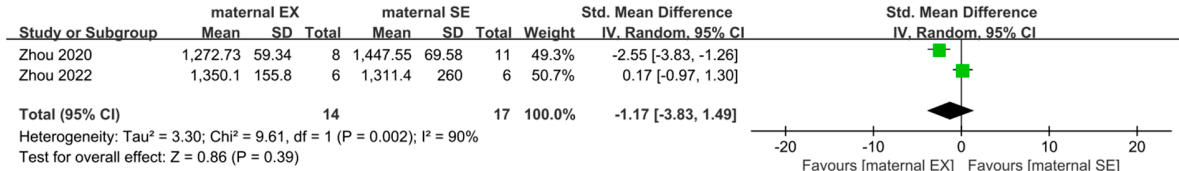

Supplement: s1 [file s1]
