# Supplementary material for: Maternal Exercise Impacts Offspring Metabolic Health in Adulthood: A Systematic Review and Meta-Analysis of Animal Studies
Source: Nutrients. 2023 Jun 19;15(12):2793. doi: 10.3390/nu15122793 (PMC10303375; doi:10.3390/nu15122793)
Supplement: Supplementary file 1 [file nutrients-15-02793-s001.zip › Table S1 study quality_risk assessment.xlsx]

## Sheet: Sheet1
	Zhou, 2022	Zhou, 2020	Zheng, 2020	Tebas, 2020	Boonpattrawong, 2020	Gartz, 2020	Ferrari, 2018	Sheldon, 2016	Laker, 2014
were the experimenters blinded?	0	0	x	x	x	x	x	x	x
was the control group a reliable baseline?	0	0	0	0	1	0	1	1	1
was outcome assessment performed randomly?	x	x	x	x	x	x	x	x	x
was outcome assessment performed blindly?	x	x	x	x	x	x	x	x	x
was group allocation randomly?	0	0	0	0	0	0	0	0	0
were animals selected randomly?	0	0	0	0	0	0	0	0	0
were animals randomly housed?	0	0	0	0	0	0	0	0	0
were imcomplete data adequately addressed?	x	x	x	x	x	x	1	1	1
were studies free of selective outcomes reporting?	x	x	x	x	x	x	1	x	x
were studies free of other source of bias?	x	x	x	x	1	x	x	1	1
yes	0
no	1
unclear	x
